# Supplementary material for: Protonated iron–phthalocyanine complex used for cathode material of a hydrogen peroxide fuel cell operated under acidic conditions
Source: Royal Society of Chemistry journal article supplement (doi:10.1039/c1ee01587g), 2011-01-01
Supplement: c1ee01587g.pdf [file c1ee01587g.pdf]

## **Electronic Supplementary Information**

**for**

### **Protonated iron-phthalocyaninate complex used for cathode material for a hydrogen peroxide fuel cell operated under acidic conditions**

**Yusuke Yamada,\* Sho Yoshida, Tatsuhiko Honda and Shunichi Fukuzumi\***

## Experimental Section

**Materials.** [Fe(TPP)Cl], [Fe(OEP)Cl] and [Fe(Pc)Cl] were purchased from Aldrich Chemicals and used without any other purification. Ni mesh (150 mesh) and glassy carbon electrodes (3 mm $\phi$  or 1cm x 1cm) were purchased from BAS Ltd. Purification of water (18.2 M $\Omega$  cm) was performed with a Milli-Q system (Millipore, Direct-Q 3 UV). Fe complexes of [Fe(OEP)Cl], [Fe(TPP)Cl] and [Fe(Pc)Cl] were purchased from Sigma-Aldrich.

**Mounting Fe Complex on a Glassy Carbon Electrode.** [Fe(TPP)Cl], [Fe(OEP)Cl] or [Fe(Pc)Cl] was dissolved in benzonitrile. (0.60 mg, 1mL, A trace amount of trifluoroacetic acid was added to a solution of [Fe(Pc)Cl] for increasing solubility.) A small portion of the solution (7.0  $\mu$ L) was placed on a glassy carbon electrode (0.071 cm<sup>2</sup>) and dried in an oven at 70 °C for 40 min. For Nafion coating, a surface of Fe complex-modified electrode was immersed in a 10  $\mu$ L Nafion solution (MeOH, 0.05%) and dried in an oven at 70 °C for 40 min. The loaded amount of Fe complex on the glassy carbon electrode was calculated based on the current for the reduction of Fe<sup>III</sup>/Fe<sup>II</sup> in the solution without H<sub>2</sub>O<sub>2</sub>. The charges for the reduction of [Fe(TPP)Cl], [Fe(OEP)Cl] and [Fe(Pc)Cl] were  $3.6 \times 10^{-7}$ ,  $7.6 \times 10^{-7}$  and  $2.9 \times 10^{-6}$  C, which correspond to  $3.7 \times 10^{-12}$ ,  $7.9 \times 10^{-12}$  and  $3.0 \times 10^{-11}$  mol, respectively.

**Electrochemical reduction of Hydrogen Peroxide with [Fe(OEP)Cl], [Fe(TPP)Cl] and [Fe(Pc)Cl].** The electrochemical behaviours of H<sub>2</sub>O<sub>2</sub> at electrodes modified with Fe complexes were examined using an ALS 630B electrochemical analyzer. Saturated calomel electrode and platinum electrodes were used as reference and counter electrodes, respectively. Glassy carbon electrodes mounting [Fe(OEP)Cl], [Fe(TPP)Cl] or [Fe(Pc)Cl] were used as working electrodes. The measurements were performed at room temperature in acetate buffer solutions (pH 4) containing 3mM H<sub>2</sub>O<sub>2</sub>.

**Evaluation of the performance of a H<sub>2</sub>O<sub>2</sub> fuel cell.** A buffer solution of pH 3-5 containing H<sub>2</sub>O<sub>2</sub> solution (300 mM) was placed in a one-compartment electrochemical cell. Ni and glassy carbon electrode with [Fe(OEP)Cl], [Fe(TPP)Cl] or [Fe(Pc)Cl] were immersed in the H<sub>2</sub>O<sub>2</sub> solution. Cell performance was evaluated by a BAS 100W. Measurements were performed in a deaerated acetate buffer solution at room temperature.

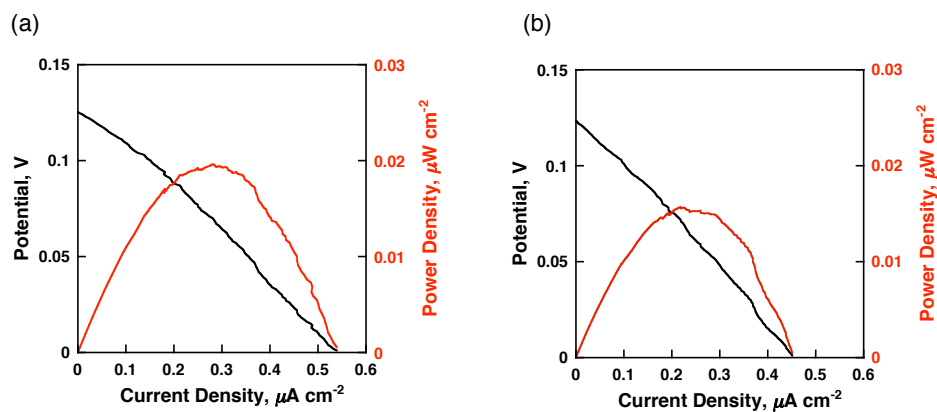

**Fig. S1.** *I-V* (black) and *I-P* (red) curves of a one-compartment H<sub>2</sub>O<sub>2</sub> fuel cell with a Ni anode and cathodes modified with (a) [Fe(TPP)Cl] and (b) [Fe(OEP)Cl]. Performance tests were conducted in an acetate buffer containing 300 mM H<sub>2</sub>O<sub>2</sub>. The pH of the solutions was fixed to be 4. Current density was normalized by the geometrical area of glassy carbon electrode.
